# Supplementary material
Source: PubMed Central journal article supplement (PMC9742341)
Supplement: NIHMS1851380-supplement-Table_S1.pdf [file NIHMS1851380-supplement-Table_S1.pdf]

| Primer            | 5'-3' sequence                                                                                           | Comment                                                                                       |
|-------------------|----------------------------------------------------------------------------------------------------------|-----------------------------------------------------------------------------------------------|
| R2614             | GTGACTGGAGTTCAGACGTGTGCTCTT<br>CCGATCTNNNNNNNNNNNNNNN <b>CAGTTTAACTTTGGGCCATCCATTCC</b>                  | cDNA primer for PR.                                                                           |
| R3284             | GTGACTGGAGTTCAGACGTGTGCTCTT<br>CCGATCTNNNNNNNNNNNNNNN <b>CAGTCACTATAGGCTGTA</b> CTGTCCATTTATC            | cDNA primer for RT.                                                                           |
| R4752             | GTGACTGGAGTTCAGACGTGTGCTCTT<br>CCGATCTNNNNNNNNNNNNNNN <b>ATCGAATAC</b> TGCCATTTGTA <b>CTGC</b>           | cDNA primer for IN.                                                                           |
| R7209             | GTGACTGGAGTTCAGACGTGTGCTCTT<br>CCGATCTNNNNNNNNNNNNNNN <b>CAGTCCATT</b> TTGCTYTAYTRABVTTACA <b>ATRTGC</b> | cDNA primer for V1/V3.                                                                        |
| F2163             | GCCTCCCTCGCGCCATCAGAGATGTGT<br>ATAAGAGACAGNNNN <b>T</b> CAGAGCAGACCAGAGCCAACAGCCCA                       | 1 <sup>st</sup> round PCR forward primer for PR.                                              |
| F2620             | GCCTCCCTCGCGCCATCAGAGATGTGT<br>ATAAGAGACAGNNNN <b>G</b> GCCATTGACAGAAGAAAAATAAAAGC                       | 1 <sup>st</sup> round PCR forward primer for RT.                                              |
| F4383             | GCCTCCCTCGCGCCATCAGAGATGTGT<br>ATAAGAGACAGNNNN <b>AAAAGGAGAAGC</b> CATGCATG                              | 1 <sup>st</sup> round PCR forward primer for IN.                                              |
| V1F               | GCCTCCCTCGCGCCATCAGAGATGTGT<br>ATAAGAGACAGNNNN <b>TTATGGGATCAA</b> AGCCTAAAGCCATGTGTA                    | 1 <sup>st</sup> round PCR forward primer for V1/V3.                                           |
| Adapter R         | GTGACTGGAGTTCAGACGTGTGCTC                                                                                | 1 <sup>st</sup> round PCR reverse primer                                                      |
| Universal Adapter | AATGATACGGCGACCACCGAGATCTAC<br>ACGCCTCCCTCGCGCCATCAGAGATGT<br>G                                          | 2 <sup>nd</sup> round PCR forward primer with Illumina adapter sequence                       |
| Indexed Adapter** | CAAGCAGAAGACGGCATA <b>C</b> GAGATNN<br>NNNNGTGACTGGAGTTCAGACGTGTG<br>CTC                                 | 2 <sup>nd</sup> round PCR reverse primer with Illumina adapter sequence and indices (NNNNNNN) |
| Old Nextera       | GCCTCCCTCGCGCCATCAGAGATGTGT<br>ATAAGAGACAG                                                               | Customized sequencing primer                                                                  |

\* cDNA primer has a block of degenerate nucleotides (Ns) as the Primer ID.

\*\* Ns in the Indexed Adapter primers are a set of 24 pre-designed barcodes for multiplexing samples for one MiSeq run. See the index sequences and adapter sequences in Table 2.
