# Supplementary material
Source: PubMed Central journal article supplement (PMC9742341)
Supplement: NIHMS1851380-supplement-Table_S2.pdf [file NIHMS1851380-supplement-Table_S2.pdf]

| <b>Mix A</b> |                                                                            |                                                                      |
|--------------|----------------------------------------------------------------------------|----------------------------------------------------------------------|
| Region       | cDNA primer with Primer ID                                                 | 1st Round PCR Forward                                                |
| S-N-3        | GTGACTGGAGTTCAGACGTGTGCTCTTCCGATCTN<br>NNNNNNNNNNCAGTAGTACCAAAAATCCAGCCTCT | GCCTCCCTCGCGCCATCAGAGATGTGTATAAGA<br>GACAGNNNNAAGGGGACTGCTGTTATGT    |
| S-RBD-1      | GTGACTGGAGTTCAGACGTGTGCTCTTCCGATCTN<br>NNNNNNNNNNCAGTAGTTGCTGATTCTCTTCCTGT | GCCTCCCTCGCGCCATCAGAGATGTGTATAAGA<br>GACAGNNNNAATTTAGTGCCTGATCTCCCT  |
| S-RBD-10     | GTGACTGGAGTTCAGACGTGTGCTCTTCCGATCTN<br>NNNNNNNNNNCAGTTGCTGGTGCATGTAGAAGTT  | GCCTCCCTCGCGCCATCAGAGATGTGTATAAGA<br>GACAGNNNNTTCCGCATCATTTTCCACTTT  |
| S2-9         | GTGACTGGAGTTCAGACGTGTGCTCTTCCGATCTN<br>NNNNNNNNNNCAGTGGCAATGATGGATTGACTAGC | GCCTCCCTCGCGCCATCAGAGATGTGTATAAGA<br>GACAGNNNNGGCACAGGTGTTCTTACTGA   |
| NSP12-5      | GTGACTGGAGTTCAGACGTGTGCTCTTCCGATCTN<br>NNNNNNNNNNCAGTGCCAACCACCATAGAATTT   | GCCTCCCTCGCGCCATCAGAGATGTGTATAAGA<br>GACAGNNNNCTTCTTCTTTGCTCAGGATGG  |
| <b>Mix B</b> |                                                                            |                                                                      |
| Region       | cDNA primer with Primer ID                                                 | 1st Round PCR Forward                                                |
| S1-15        | GTGACTGGAGTTCAGACGTGTGCTCTTCCGATCTN<br>NNNNNNNNNNCAGTGTCTAAAGCCGAAAAACCCT  | GCCTCCCTCGCGCCATCAGAGATGTGTATAAGA<br>GACAGNNNNTTGATAACCCTGTCCTACCA   |
| S-9          | GTGACTGGAGTTCAGACGTGTGCTCTTCCGATCTN<br>NNNNNNNNNNCAGTAGCTATAACGCAGCCTGTAA  | GCCTCCCTCGCGCCATCAGAGATGTGTATAAGA<br>GACAGNNNNTGTACGTTGAAATCCTTCACTG |
| S-gap-4      | GTGACTGGAGTTCAGACGTGTGCTCTTCCGATCTN<br>NNNNNNNNNNCAGTCAGGGACTTCTGTGCAGTTA  | GCCTCCCTCGCGCCATCAGAGATGTGTATAAGA<br>GACAGNNNNCCGGTAGCACACCTTGTAAAT  |
| S2-3         | GTGACTGGAGTTCAGACGTGTGCTCTTCCGATCTN<br>NNNNNNNNNNCAGTGACCTCTTGCTTGGTTTTGA  | GCCTCCCTCGCGCCATCAGAGATGTGTATAAGA<br>GACAGNNNNTGCAGGTATATGCGCTAGTT   |
